# Supplementary material for: Impact of Ukrainian Refugees on the COVID-19 Pandemic Dynamics after 24 February 2022
Source: MDPI journal article supplement (doi:10.3390/computation12040070), 2024-04-03
Supplement: s1 [file s1]

## Supplementary

**Table S1.** Cumulative numbers of laboratory-confirmed Covid-19 cases in Ukraine for the period of November 1, 2021 to February 24, 2022 according to JHU report on April 13, 2022, [4].

| Day in corresponding month of 2021 and 2022 | Number of cases in November 2021, $V_j$ | Number of cases in December 2021, $V_j$ | Number of cases in January 2022, $V_j$ | Number of cases in February 2022, $V_j$ |
|---------------------------------------------|-----------------------------------------|-----------------------------------------|----------------------------------------|-----------------------------------------|
| 1                                           | 3073125                                 | 3619223                                 | 3852397                                | 4287117                                 |
| 2                                           | 3093661                                 | 3633386                                 | 3854405                                | 4323009                                 |
| 3                                           | 3118140                                 | 3647777                                 | 3856359                                | 4363754                                 |
| 4                                           | 3146617                                 | 3661583                                 | 3858248                                | 4408776                                 |
| 5                                           | 3174223                                 | 3668794                                 | 3862959                                | 4452612                                 |
| 6                                           | 3200411                                 | 3673839                                 | 3869728                                | 4481918                                 |
| 7                                           | 3218967                                 | 3683044                                 | 3877032                                | 4506669                                 |
| 8                                           | 3233178                                 | 3692939                                 | 3880371                                | 4542568                                 |
| 9                                           | 3253327                                 | 3705823                                 | 3883316                                | 4582137                                 |
| 10                                          | 3277772                                 | 3717640                                 | 3885416                                | 4625614                                 |
| 11                                          | 3303694                                 | 3728246                                 | 3890974                                | 4668581                                 |
| 12                                          | 3328934                                 | 3733967                                 | 3898240                                | 4708604                                 |
| 13                                          | 3353694                                 | 3738390                                 | 3908469                                | 4735258                                 |
| 14                                          | 3369387                                 | 3746106                                 | 3919151                                | 4753922                                 |
| 15                                          | 3381399                                 | 3754567                                 | 3929950                                | 4785138                                 |
| 16                                          | 3398913                                 | 3764485                                 | 3936582                                | 4818112                                 |
| 17                                          | 3418792                                 | 3773700                                 | 3941923                                | 4853339                                 |
| 18                                          | 3440602                                 | 3781506                                 | 3950774                                | 4890332                                 |
| 19                                          | 3461873                                 | 3785395                                 | 3963917                                | 4923680                                 |
| 20                                          | 3481347                                 | 3788209                                 | 3982738                                | 4943428                                 |
| 21                                          | 3493203                                 | 3794490                                 | 4003280                                | 4959461                                 |
| 22                                          | 3501815                                 | 3801079                                 | 4026198                                | 4986161                                 |
| 23                                          | 3515641                                 | 3808612                                 | 4042152                                | 5012980                                 |
| 24                                          | 3530969                                 | 3815440                                 | 4055643                                | 5040518                                 |
| 25                                          | 3548842                                 | 3820891                                 | 4075351                                | No data                                 |
| 26                                          | 3565644                                 | 3823879                                 | 4100292                                | No data                                 |
| 27                                          | 3580671                                 | 3825917                                 | 4133396                                | No data                                 |
| 28                                          | 3588916                                 | 3828336                                 | 4168560                                | No data                                 |
| 29                                          | 3595410                                 | 3833952                                 | 4206731                                | No data                                 |
| 30                                          | 3606622                                 | 3840041                                 | 4232143                                | No data                                 |
| 31                                          | -                                       | 3847226                                 | 4255206                                | No data                                 |

**Table S2.** Cumulative numbers of laboratory-confirmed Covid-19 cases in the world for the period of November 1, 2021 to April 12, 2022 according to JHU report on April 13, 2022, [4].

| Day in<br>corres-<br>ponding<br>month of<br>2021 and<br>2022 | Number of cases<br>in November<br>2021,<br>$V_j$ | Number of<br>cases in<br>December<br>2021,<br>$V_j$ | Number of cases<br>in January<br>2022,<br>$V_j$ | Number of cases<br>in February<br>2022,<br>$V_j$ | Number of cases<br>in March 2022,<br>$V_j$ | Number of cases<br>in April<br>2022,<br>$V_j$ |
|--------------------------------------------------------------|--------------------------------------------------|-----------------------------------------------------|-------------------------------------------------|--------------------------------------------------|--------------------------------------------|-----------------------------------------------|
| 1                                                            | 247862074                                        | 263807528                                           | 289927623                                       | 382057655                                        | 438638152                                  | 489570107                                     |
| 2                                                            | 248266150                                        | 264513551                                           | 290847589                                       | 385246182                                        | 440298642                                  | 490615023                                     |
| 3                                                            | 248790581                                        | 265242947                                           | 293206749                                       | 388418808                                        | 442054923                                  | 491403738                                     |
| 4                                                            | 249310490                                        | 265778142                                           | 295706744                                       | 391363495                                        | 443808766                                  | 492308878                                     |
| 5                                                            | 249834773                                        | 266237498                                           | 298280821                                       | 393663274                                        | 445278431                                  | 493667646                                     |
| 6                                                            | 250272210                                        | 266836489                                           | 300938774                                       | 395535273                                        | 446490779                                  | 495121230                                     |
| 7                                                            | 250632969                                        | 267476824                                           | 303882579                                       | 398131340                                        | 447913616                                  | 496337008                                     |
| 8                                                            | 251103998                                        | 268189875                                           | 306061605                                       | 400756040                                        | 449664409                                  | 497530264                                     |
| 9                                                            | 251571331                                        | 268887169                                           | 308097605                                       | 403194717                                        | 451503752                                  | 498298585                                     |
| 10                                                           | 252148459                                        | 269580734                                           | 311285781                                       | 405974555                                        | 453364661                                  | 498866902                                     |
| 11                                                           | 252669280                                        | 270101373                                           | 314317623                                       | 408396208                                        | 455215091                                  | 499842091                                     |
| 12                                                           | 253267145                                        | 270557090                                           | 317770589                                       | 410315599                                        | 456963450                                  | 500878952                                     |
| 13                                                           | 253708184                                        | 271167762                                           | 320952544                                       | 411833078                                        | 458244773                                  |                                               |
| 14                                                           | 254086682                                        | 271805943                                           | 324268400                                       | 413532555                                        | 459874155                                  |                                               |
| 15                                                           | 254613141                                        | 272545359                                           | 326765265                                       | 415412111                                        | 461676661                                  |                                               |
| 16                                                           | 255118609                                        | 273288038                                           | 328943173                                       | 417649604                                        | 463900108                                  |                                               |
| 17                                                           | 255737422                                        | 274055576                                           | 331604331                                       | 419706593                                        | 465953017                                  |                                               |
| 18                                                           | 256358930                                        | 274625828                                           | 335364892                                       | 421685829                                        | 467866738                                  |                                               |
| 19                                                           | 256975072                                        | 275138218                                           | 339453918                                       | 423314385                                        | 469575841                                  |                                               |
| 20                                                           | 257475402                                        | 275874759                                           | 343159424                                       | 424639646                                        | 470645978                                  |                                               |
| 21                                                           | 257896061                                        | 276631163                                           | 346995120                                       | 426035583                                        | 472116618                                  |                                               |
| 22                                                           | 258497626                                        | 277541705                                           | 349784219                                       | 427747662                                        | 474092054                                  |                                               |
| 23                                                           | 259087921                                        | 278548452                                           | 352240761                                       | 429674701                                        | 475864692                                  |                                               |
| 24                                                           | 259748956                                        | 279440261                                           | 355663188                                       | 431442819                                        | 477616071                                  |                                               |
| 25                                                           | 260347371                                        | 280142385                                           | 359314204                                       | 433079615                                        | 479457172                                  |                                               |
| 26                                                           | 260957671                                        | 280722452                                           | 362976531                                       | 434508761                                        | 480813689                                  |                                               |
| 27                                                           | 261441136                                        | 281990658                                           | 366732889                                       | 435655616                                        | 481725638                                  |                                               |
| 28                                                           | 261871606                                        | 283317208                                           | 370352923                                       | 437014406                                        | 483218323                                  |                                               |
| 29                                                           | 262502486                                        | 285013613                                           | 373093920                                       | -                                                | 484967067                                  |                                               |
| 30                                                           | 263102705                                        | 286956097                                           | 375410506                                       | -                                                | 486559347                                  |                                               |
| 31                                                           | -                                                | 288702042                                           | 378897181                                       | -                                                | 488405398                                  |                                               |

**Table S3.** Cumulative numbers of laboratory-confirmed Covid-19 cases in Poland for the period of November 1, 2021 to April 12, 2022 according to JHU report on April 13, 2022, [4].

| Day in<br>corres-<br>ponding<br>month of<br>2021 and<br>2022 | Number of cases<br>in<br>November 2021,<br>$V_j$ | Number of<br>cases in<br>December<br>2021,<br>$V_j$ | Number of<br>cases in<br>January<br>2022,<br>$V_j$ | Number of<br>cases in<br>February<br>2022,<br>$V_j$ | Number of<br>cases in<br>March<br>2022,<br>$V_j$ | Number of<br>cases in<br>April<br>2022,<br>$V_j$ |
|--------------------------------------------------------------|--------------------------------------------------|-----------------------------------------------------|----------------------------------------------------|-----------------------------------------------------|--------------------------------------------------|--------------------------------------------------|
| 1                                                            | 3030151                                          | 3569137                                             | 4120248                                            | 4925270                                             | 5680034                                          | 5966970                                          |
| 2                                                            | 3034668                                          | 3596491                                             | 4127428                                            | 4981321                                             | 5694767                                          | 5969071                                          |
| 3                                                            | 3045102                                          | 3623452                                             | 4133851                                            | 5035796                                             | 5708827                                          | 5969621                                          |
| 4                                                            | 3060613                                          | 3649027                                             | 4145518                                            | 5083332                                             | 5721316                                          | 5970114                                          |
| 5                                                            | 3076518                                          | 3671421                                             | 4162715                                            | 5129080                                             | 5734041                                          | 5971998                                          |
| 6                                                            | 3091713                                          | 3684671                                             | 4179292                                            | 5163780                                             | 5741739                                          | 5973557                                          |
| 7                                                            | 3104220                                          | 3704040                                             | 4191193                                            | 5188184                                             | 5747322                                          | 5975040                                          |
| 8                                                            | 3111534                                          | 3732589                                             | 4202090                                            | 5223507                                             | 5760498                                          | 5976364                                          |
| 9                                                            | 3125179                                          | 3760048                                             | 4213197                                            | 5270363                                             | 5774938                                          | 5977773                                          |
| 10                                                           | 3143725                                          | 3785036                                             | 4220984                                            | 5312450                                             | 5788363                                          | 5978215                                          |
| 11                                                           | 3162804                                          | 3808798                                             | 4232386                                            | 5348224                                             | 5799996                                          | 5978596                                          |
| 12                                                           | 3175769                                          | 3828248                                             | 4248559                                            | 5379551                                             | 5811109                                          | 5980220                                          |
| 13                                                           | 3190067                                          | 3839625                                             | 4265433                                            | 5401615                                             | 5818687                                          |                                                  |
| 14                                                           | 3204515                                          | 3857085                                             | 4281482                                            | 5415088                                             | 5823982                                          |                                                  |
| 15                                                           | 3214023                                          | 3881349                                             | 4298375                                            | 5437343                                             | 5836672                                          |                                                  |
| 16                                                           | 3230634                                          | 3903445                                             | 4313036                                            | 5466198                                             | 5851147                                          |                                                  |
| 17                                                           | 3254875                                          | 3923472                                             | 4323482                                            | 5495432                                             | 5863414                                          |                                                  |
| 18                                                           | 3279787                                          | 3942864                                             | 4343130                                            | 5519411                                             | 5875072                                          |                                                  |
| 19                                                           | 3303046                                          | 3958840                                             | 4373718                                            | 5540302                                             | 5885446                                          |                                                  |
| 20                                                           | 3326464                                          | 3968450                                             | 4406553                                            | 5553989                                             | 5891140                                          |                                                  |
| 21                                                           | 3345388                                          | 3982257                                             | 4443217                                            | 5563446                                             | 5895304                                          |                                                  |
| 22                                                           | 3357763                                          | 4000270                                             | 4484095                                            | 5582217                                             | 5905463                                          |                                                  |
| 23                                                           | 3377698                                          | 4017420                                             | 4518218                                            | 5602680                                             | 5915888                                          |                                                  |
| 24                                                           | 3406129                                          | 4032796                                             | 4547315                                            | 5620946                                             | 5924876                                          |                                                  |
| 25                                                           | 3434272                                          | 4043585                                             | 4584360                                            | 5637646                                             | 5933107                                          |                                                  |
| 26                                                           | 3461066                                          | 4049838                                             | 4637776                                            | 5651596                                             | 5939735                                          |                                                  |
| 27                                                           | 3487254                                          | 4054865                                             | 4695435                                            | 5660493                                             | 5943227                                          |                                                  |
| 28                                                           | 3507828                                          | 4064715                                             | 4752700                                            | 5667054                                             | 5945594                                          |                                                  |
| 29                                                           | 3520961                                          | 4080282                                             | 4804390                                            | -                                                   | 5952200                                          |                                                  |
| 30                                                           | 3540061                                          | 4094608                                             | 4852677                                            | -                                                   | 5957940                                          |                                                  |
| 31                                                           | -                                                | 4108215                                             | 4886154                                            | -                                                   | 5962931                                          |                                                  |

**Table S4.** Cumulative numbers of laboratory-confirmed Covid-19 cases in Germany for the period of November 1, 2021 to April 12, 2022 according to JHU report on April 13, 2022, [4].

| Day in corresponding month of 2021 and 2022 | Number of cases in November 2021, $V_j$ | Number of cases in December 2021, $V_j$ | Number of cases in January 2022, $V_j$ | Number of cases in February 2022, $V_j$ | Number of cases in March 2022, $V_j$ | Number of cases in April 2022, $V_j$ |
|---------------------------------------------|-----------------------------------------|-----------------------------------------|----------------------------------------|-----------------------------------------|--------------------------------------|--------------------------------------|
| 1                                           | 4607208                                 | 5903999                                 | 7176814                                | 9978146                                 | 14867218                             | 21357039                             |
| 2                                           | 4618021                                 | 5977208                                 | 7189329                                | 10186644                                | 15053624                             | 21553495                             |
| 3                                           | 4638419                                 | 6051560                                 | 7207847                                | 10422764                                | 15264297                             | 21668677                             |
| 4                                           | 4672368                                 | 6116070                                 | 7238408                                | 10671602                                | 15481890                             | 21668677                             |
| 5                                           | 4709488                                 | 6158125                                 | 7297320                                | 10889417                                | 15674100                             | 21849074                             |
| 6                                           | 4743490                                 | 6185961                                 | 7361660                                | 11022590                                | 15790989                             | 22265788                             |
| 7                                           | 4767033                                 | 6222020                                 | 7417995                                | 11117857                                | 15869417                             | 22441051                             |
| 8                                           | 4782546                                 | 6291621                                 | 7473884                                | 11287428                                | 16026216                             | 22591726                             |
| 9                                           | 4804378                                 | 6362232                                 | 7510436                                | 11521678                                | 16242070                             | 22647197                             |
| 10                                          | 4844054                                 | 6423520                                 | 7535691                                | 11769540                                | 16504822                             | 22677986                             |
| 11                                          | 4894250                                 | 6477217                                 | 7581381                                | 12009712                                | 16757658                             | 22878428                             |
| 12                                          | 4942890                                 | 6509863                                 | 7661811                                | 12219501                                | 16994744                             | 23017079                             |
| 13                                          | 4987971                                 | 6531606                                 | 7743228                                | 12344661                                | 17141351                             |                                      |
| 14                                          | 5021469                                 | 6562429                                 | 7835451                                | 12421126                                | 17233729                             |                                      |
| 15                                          | 5045076                                 | 6613730                                 | 7913473                                | 12580343                                | 17432617                             |                                      |
| 16                                          | 5077124                                 | 6670407                                 | 7965977                                | 12800315                                | 17695210                             |                                      |
| 17                                          | 5129950                                 | 6721375                                 | 8000122                                | 13035941                                | 17990141                             |                                      |
| 18                                          | 5195321                                 | 6764188                                 | 8074527                                | 13255989                                | 18287986                             |                                      |
| 19                                          | 5248291                                 | 6793536                                 | 8186850                                | 13445094                                | 18548225                             |                                      |
| 20                                          | 5312215                                 | 6809622                                 | 8320386                                | 13563126                                | 18680017                             |                                      |
| 21                                          | 5354942                                 | 6833050                                 | 8460546                                | 13636993                                | 18772331                             |                                      |
| 22                                          | 5385585                                 | 6878709                                 | 8596007                                | 13762895                                | 18994411                             |                                      |
| 23                                          | 5430911                                 | 6923636                                 | 8681447                                | 13971947                                | 19278143                             |                                      |
| 24                                          | 5497795                                 | 6959067                                 | 8744840                                | 14188269                                | 19596530                             |                                      |
| 25                                          | 5573756                                 | 6981281                                 | 8871795                                | 14399012                                | 19893028                             |                                      |
| 26                                          | 5650170                                 | 6991381                                 | 9035795                                | 14574845                                | 20145054                             |                                      |
| 27                                          | 5717295                                 | 7005289                                 | 9238931                                | 14682758                                | 20256278                             |                                      |
| 28                                          | 5761696                                 | 7026369                                 | 9429079                                | 14745107                                | 20323779                             |                                      |
| 29                                          | 5791060                                 | 7066412                                 | 9618245                                | -                                       | 20561131                             |                                      |
| 30                                          | 5836813                                 | 7109182                                 | 9737215                                | -                                       | 20829608                             |                                      |
| 31                                          | -                                       | 7150422                                 | 9815533                                | -                                       | 21357095                             |                                      |

**Table S5.** Cumulative numbers of laboratory-confirmed Covid-19 cases in the Republic of Moldova for the period of November 1, 2021 to April 12, 2022 according to JHU report on April 13, 2022, [4].

| Day in corresponding month of 2021 and 2022 | Number of cases in November 2021, $V_j$ | Number of cases in December 2021, $V_j$ | Number of cases in January 2022, $V_j$ | Number of cases in February 2022, $V_j$ | Number of cases in March 2022, $V_j$ | Number of cases in April 2022, $V_j$ |
|---------------------------------------------|-----------------------------------------|-----------------------------------------|----------------------------------------|-----------------------------------------|--------------------------------------|--------------------------------------|
| 1                                           | 339114                                  | 364433                                  | 376434                                 | 445046                                  | 502386                               | 513757                               |
| 2                                           | 340188                                  | 365165                                  | 376602                                 | 449840                                  | 502956                               | 514014                               |
| 3                                           | 341675                                  | 365713                                  | 376844                                 | 455095                                  | 503690                               | 514199                               |
| 4                                           | 343261                                  | 366162                                  | 377496                                 | 460307                                  | 504307                               | 514222                               |
| 5                                           | 344563                                  | 366256                                  | 378202                                 | 464234                                  | 504875                               | 514428                               |
| 6                                           | 345517                                  | 366751                                  | 378904                                 | 467271                                  | 505393                               | 514650                               |
| 7                                           | 345964                                  | 367339                                  | 379572                                 | 468782                                  | 505644                               | 514882                               |
| 8                                           | 347105                                  | 367948                                  | 379901                                 | 471524                                  | 505996                               | 515121                               |
| 9                                           | 348588                                  | 368497                                  | 380290                                 | 474548                                  | 506222                               | 515312                               |
| 10                                          | 349568                                  | 369013                                  | 380985                                 | 477419                                  | 506681                               | 515445                               |
| 11                                          | 350697                                  | 369402                                  | 382124                                 | 480289                                  | 507028                               | 515488                               |
| 12                                          | 351940                                  | 369659                                  | 383544                                 | 482842                                  | 507599                               | 515649                               |
| 13                                          | 352670                                  | 370003                                  | 385047                                 | 484516                                  | 507994                               |                                      |
| 14                                          | 352822                                  | 370459                                  | 386905                                 | 485563                                  | 508235                               |                                      |
| 15                                          | 353778                                  | 370951                                  | 387920                                 | 487283                                  | 508578                               |                                      |
| 16                                          | 354755                                  | 371410                                  | 388959                                 | 488899                                  | 508917                               |                                      |
| 17                                          | 355646                                  | 371850                                  | 390742                                 | 490751                                  | 509367                               |                                      |
| 18                                          | 356448                                  | 372154                                  | 393423                                 | 492604                                  | 509834                               |                                      |
| 19                                          | 357211                                  | 372200                                  | 396678                                 | 494219                                  | 510206                               |                                      |
| 20                                          | 357831                                  | 372429                                  | 400585                                 | 495184                                  | 510460                               |                                      |
| 21                                          | 358202                                  | 372983                                  | 404556                                 | 495415                                  | 510700                               |                                      |
| 22                                          | 358857                                  | 373373                                  | 407003                                 | 496976                                  | 510973                               |                                      |
| 23                                          | 359401                                  | 373752                                  | 409397                                 | 497946                                  | 511231                               |                                      |
| 24                                          | 360261                                  | 374120                                  | 412231                                 | 499015                                  | 511662                               |                                      |
| 25                                          | 361116                                  | 374349                                  | 417369                                 | 500144                                  | 512047                               |                                      |
| 26                                          | 361828                                  | 374526                                  | 423568                                 | 500812                                  | 512386                               |                                      |
| 27                                          | 362326                                  | 374763                                  | 428934                                 | 501312                                  | 512602                               |                                      |
| 28                                          | 362433                                  | 375065                                  | 434549                                 | 501800                                  | 512638                               |                                      |
| 29                                          | 363110                                  | 375358                                  | 438249                                 | -                                       | 512942                               |                                      |
| 30                                          | 363774                                  | 375780                                  | 438249                                 | -                                       | 513146                               |                                      |
| 31                                          | -                                       | 376155                                  | 440698                                 | -                                       | 513442                               |                                      |

**Table S6.** Cumulative numbers of laboratory-confirmed Covid-19 cases in the UK for the period of November 1, 2021 to April 30, 2022 according to JHU report on December 11, 2023, [4].

| Day in corresponding month of 2021 and 2022 | Number of cases in November 2021, $V_j$ | Number of cases in December 2021, $V_j$ | Number of cases in January 2022, $V_j$ | Number of cases in February 2022, $V_j$ | Number of cases in March 2022, $V_j$ | Number of cases in April 2022, $V_j$ |
|---------------------------------------------|-----------------------------------------|-----------------------------------------|----------------------------------------|-----------------------------------------|--------------------------------------|--------------------------------------|
| 1                                           | 9266373                                 | 10476077                                | 13678283                               | 17515752                                | 18987410                             | 21209728                             |
| 2                                           | 9301187                                 | 10531772                                | 13866850                               | 17620803                                | 19032059                             | 21264519                             |
| 3                                           | 9346296                                 | 10586592                                | 13985125                               | 17714752                                | 19076854                             | 21311981                             |
| 4                                           | 9384315                                 | 10636911                                | 14166193                               | 17803170                                | 19123033                             | 21349573                             |
| 5                                           | 9420301                                 | 10682578                                | 14396094                               | 17879814                                | 19166794                             | 21391752                             |
| 6                                           | 9453963                                 | 10721362                                | 14671741                               | 17943078                                | 19208202                             | 21445479                             |
| 7                                           | 9484281                                 | 10762413                                | 14893915                               | 17995383                                | 19246961                             | 21494580                             |
| 8                                           | 9511717                                 | 10822107                                | 15066895                               | 18055935                                | 19295987                             | 21539330                             |
| 9                                           | 9542303                                 | 10878365                                | 15187182                               | 18132418                                | 19364507                             | 21578039                             |
| 10                                          | 9586429                                 | 10937192                                | 15280797                               | 18202079                                | 19434619                             | 21611027                             |
| 11                                          | 9628675                                 | 10994187                                | 15376587                               | 18266418                                | 19508150                             | 21638912                             |
| 12                                          | 9671617                                 | 11046679                                | 15509546                               | 18318711                                | 19578660                             | 21669864                             |
| 13                                          | 9712616                                 | 11095273                                | 15624791                               | 18363270                                | 19645690                             | 21707235                             |
| 14                                          | 9750379                                 | 11148431                                | 15728010                               | 18400799                                | 19707768                             | 21741006                             |
| 15                                          | 9783264                                 | 11235600                                | 15824422                               | 18442554                                | 19783507                             | 21772691                             |
| 16                                          | 9818796                                 | 11338388                                | 15910747                               | 18497299                                | 19883341                             | 21799330                             |
| 17                                          | 9869744                                 | 11451091                                | 15988697                               | 18549801                                | 19977049                             | 21820947                             |
| 18                                          | 9916174                                 | 11557146                                | 16086794                               | 18601373                                | 20068800                             | 21840872                             |
| 19                                          | 9962069                                 | 11653043                                | 16218308                               | 18646089                                | 20151653                             | 21861016                             |
| 20                                          | 10006131                                | 11741926                                | 16337165                               | 18679330                                | 20226938                             | 21886239                             |
| 21                                          | 10045737                                | 11831059                                | 16448925                               | 18713977                                | 20294355                             | 21912011                             |
| 22                                          | 10081072                                | 11965025                                | 16549249                               | 18751697                                | 20375409                             | 21933468                             |
| 23                                          | 10118322                                | 12115318                                | 16640979                               | 18796829                                | 20484695                             | 21951932                             |
| 24                                          | 10169055                                | 12276878                                | 16722712                               | 18836017                                | 20583790                             | 21967635                             |
| 25                                          | 10217252                                | 12437511                                | 16825077                               | 18872493                                | 20677975                             | 21980845                             |
| 26                                          | 10264024                                | 12574779                                | 16952441                               | 18903124                                | 20760880                             | 21995560                             |
| 27                                          | 10307449                                | 12645142                                | 17065643                               | 18930961                                | 20833310                             | 22012669                             |
| 28                                          | 10346779                                | 12761429                                | 17174311                               | 18956050                                | 20894766                             | 22027229                             |
| 29                                          | 10380082                                | 12956440                                | 17270512                               | -                                       | 20963102                             | 22040284                             |
| 30                                          | 10419788                                | 13168909                                | 17354538                               | -                                       | 21055959                             | 22051892                             |
| 31                                          | -                                       | 13441707                                | 17428050                               | -                                       | 21136085                             | -                                    |
